# Supplementary material for: eQTLMAPT: Fast and Accurate eQTL Mediation Analysis With Efficient Permutation Testing Approaches
Source: Front Genet. 2020 Jan 9;10:1309. doi: 10.3389/fgene.2019.01309 (PMC6970436; doi:10.3389/fgene.2019.01309)
Supplement: Supplementary file 2 [file Table_1.xls]

## Sheet: Supplementary_Table_1
Supplementary Table 1. Summary statistics of mediation analyses with adjusted P-value <= 0.05.
Cis-eGene Name	Trans-eGene Name	Cis-eGene ID	Trans-eGene ID	eQTL	GPD estimated P-value	FDR	Fixed-permutation estimated P-value	Number of permutations
PLGLB2	AC125232.1	ENSG00000125551	ENSG00000231259	2:88283386:T:C_C	0	0	9.999e-05	10000
CNN2P2	RP11-4L24.4	ENSG00000227069	ENSG00000279561	9:42273384:T:C_C	0	0	9.999e-05	10000
STK19B	HLA-K	ENSG00000250535	ENSG00000230795	6:31340691:C:G_G	0	0	9.999e-05	10000
MSRA	RP11-481A20.10	ENSG00000175806	ENSG00000254507	8:9057427:G:A_A	3.5406e-13	4.90262e-10	9.999e-05	10000
XXbac-B461K10.4	USP9Y	ENSG00000093100	ENSG00000114374	22:18883763:G:T_T	8.5691e-08	9.12756e-05	9.999e-05	10000
ANKRD20A4	CBWD5	ENSG00000172014	ENSG00000147996	9:69153333:GTGTT:G_G	9.88768e-08	9.12756e-05	9.999e-05	10000
RP11-4L24.4	CNN2P2	ENSG00000279561	ENSG00000227069	9:45477356:T:C_C	1.45646e-06	0.00115243	9.999e-05	10000
F8	KDM6A	ENSG00000185010	ENSG00000147050	X:154984485:T:C_C	5.11597e-06	0.00331398	9.999e-05	10000
ZDHHC8	NKAPL	ENSG00000099904	ENSG00000189134	22:20657697:A:T_T	5.72904e-06	0.00331398	9.999e-05	10000
RP11-211N8.2	SNX18P9	ENSG00000226007	ENSG00000224185	9:46412427:T:G_G	5.98327e-06	0.00331398	9.999e-05	10000
TRIM74	PMS2P2	ENSG00000155428	ENSG00000278416	7:72467460:G:A_A	7.03525e-06	0.00354241	9.999e-05	10000
COQ5	COX6A1P2	ENSG00000110871	ENSG00000226976	12:121021614:G:A_A	5.78919e-05	0.0249578	9.999e-05	10000
CBWD7	CNN2P4	ENSG00000215126	ENSG00000213816	9:42876761:G:A_A	6.10357e-05	0.0249578	9.999e-05	10000
SEPHS1P1	RP4-756H11.3	ENSG00000182722	ENSG00000226824	7:64583964:G:A_A	6.30845e-05	0.0249578	0.00029997	10000
GXYLT1P4	ANKRD20A3	ENSG00000275026	ENSG00000276203	9:43022220:C:T_T	8.55869e-05	0.0316029	0.00029997	10000
RP11-250H24.2	CBWD5	ENSG00000229156	ENSG00000147996	9:69153333:GTGTT:G_G	0.000106331	0.0354464	0.00029997	10000
MYO15A	RP11-219A15.1	ENSG00000091536	ENSG00000266302	17:18269441:C:CATA_CATA	0.000108795	0.0354464	9.999e-05	10000
CR848007.2	RP11-475I24.3	ENSG00000170165	ENSG00000237357	9:43341454:T:A_A	0.000126302	0.0388641	0.00039996	10000
AP3B2	SC22CB-1E7.1	ENSG00000103723	ENSG00000232346	15:83264713:G:C_C	0.000139563	0.0406845	0.00019998	10000
RP11-262H14.4	CBWD5	ENSG00000170161	ENSG00000147996	9:66040384:A:C_C	0.000151546	0.0419688	0.00019998	10000
ARL17B	CTD-2020K17.3	ENSG00000228696	ENSG00000233175	17:44332959:C:T_T	0.000175533	0.0462968	0.00029997	10000
SNX18P9	GXYLT1P5	ENSG00000224185	ENSG00000276591	9:69012574:G:C_C	0.000241786	0.0608724	0.00019998	10000
RP11-344P13.6	RP6-206I17.1	ENSG00000272583	ENSG00000223804	1:120896556:A:G_G	0.000256862	0.0618563	0.00039996	10000
GTF2H2B	RP11-589F5.4	ENSG00000226259	ENSG00000253366	5:68945773:C:G_G	0.000269512	0.0621984	0.00029997	10000
PPP1R3G	CEP164P1	ENSG00000219607	ENSG00000226937	6:4224995:G:A_A	0.000310478	0.0687863	0.00049995	10000
DEF8	RPL13P12	ENSG00000140995	ENSG00000215030	16:89196279:A:G_G	0.000371808	0.0786132	0.00059994	10000
TMLHE-AS1	CTC-575D19.1	ENSG00000224533	ENSG00000233913	X:153711341:C:G_G	0.00038322	0.0786132	0.00039996	10000
F8A1	RNU2-57P	ENSG00000277203	ENSG00000252468	X:154982191:A:T_T	0.000421463	0.0833707	0.00039996	10000
GXYLT1P6	GXYLT1P5	ENSG00000235310	ENSG00000276591	9:69541837:T:C_C	0.000462263	0.0882882	0.00049995	10000
AC126544.4	RP11-798G7.8	ENSG00000282774	ENSG00000266918	17:44621635:G:C_C	0.000508462	0.0938748	0.00089991	10000
NSFP1	CTD-2020K17.3	ENSG00000260075	ENSG00000233175	17:44332959:C:T_T	0.000528797	0.0944798	0.00049995	10000
CFD	IQCG	ENSG00000197766	ENSG00000114473	19:93664:C:G_G	0.000573803	0.0993172	0.00079992	10000
NOTCH4	HLA-DRB5	ENSG00000204301	ENSG00000198502	6:31244261:C:A_A	0.000634725	0.106533	0.00069993	10000
GGT2	TMEM191B	ENSG00000133475	ENSG00000278558	22:21554218:A:T_T	0.000658457	0.107265	0.00049995	10000
CDC27	RP11-927P21.2	ENSG00000004897	ENSG00000266644	17:44409165:G:A_A	0.00085841	0.135843	0.0009999	10000
AC024937.6	AC024560.2	ENSG00000231443	ENSG00000236833	3:195658361:G:A_A	0.000979414	0.150687	0.00149985	10000
GPAT2	HKDC1	ENSG00000186281	ENSG00000156510	2:96603477:A:C_C	0.00104566	0.154	0.00159984	10000
ZDHHC8	HSFY3P	ENSG00000099904	ENSG00000227289	22:20657697:A:T_T	0.00105656	0.154	0.0009999	10000
FAM41C	WASH7P	ENSG00000230368	ENSG00000226210	1:808631:G:A_A	0.00109986	0.156201	0.00069993	10000
MAPT	RP11-927P21.2	ENSG00000186868	ENSG00000266644	17:44617980:C:A_A	0.00116066	0.160715	0.00149985	10000
MAPT-AS1	ARL17A	ENSG00000264589	ENSG00000185829	17:43573061:T:C_C	0.00122023	0.161295	0.00139986	10000
H2AFV	PPIAP29	ENSG00000105968	ENSG00000214975	7:44853106:A:T_T	0.00123045	0.161295	0.00139986	10000
TMLHE-AS1	EIF1AY	ENSG00000224533	ENSG00000198692	X:154934986:G:A_A	0.00127931	0.161295	0.00159984	10000
RP11-344P13.6	LOC100996723	ENSG00000272583	ENSG00000274642	1:120897012:T:C_C	0.00129033	0.161295	0.00149985	10000
FOXO3B	RP11-92B11.3	ENSG00000240445	ENSG00000264673	17:18417847:T:C_C	0.00131045	0.161295	0.00139986	10000
RP11-479O9.4	PSPHP1	ENSG00000272693	ENSG00000226278	7:65249920:G:T_T	0.0013793	0.161373	0.00159984	10000
KHDRBS2	XXbac-BPGBPG55C20.1	ENSG00000112232	ENSG00000272541	6:62466240:T:C_C	0.00138127	0.161373	0.00149985	10000
ZNF488	BMS1P2	ENSG00000265763	ENSG00000251079	10:48941207:T:C_C	0.00142421	0.161373	0.00159984	10000
AC125634.1	RP11-459O16.8	ENSG00000223602	ENSG00000276128	9:69738055:G:A_A	0.00142763	0.161373	0.00159984	10000
MIR4477B	NA	ENSG00000266017	ENSG00000274869	9:69382306:C:T_T	0.00149096	0.165161	0.00129987	10000
STH	RP11-707O23.5	ENSG00000256762	ENSG00000263503	17:44824213:T:G_G	0.00157799	0.171374	0.00179982	10000
RP11-927P21.2	RP11-798G7.8	ENSG00000266644	ENSG00000266918	17:62923203:A:T_T	0.00163367	0.174009	0.00139986	10000
RP6-206I17.1	NBPF26	ENSG00000223804	ENSG00000273136	1:144521237:A:T_T	0.00178749	0.182078	0.00179982	10000
CNN2P3	RP11-318K12.2	ENSG00000235832	ENSG00000275390	9:69404072:A:T_T	0.0018151	0.182078	0.00149985	10000
RP11-34P13.16	WASH3P	ENSG00000269981	ENSG00000185596	1:62777:A:T_T	0.00185795	0.182078	0.00219978	10000
STAG3L1	PMS2P2	ENSG00000205583	ENSG00000278416	7:74856613:G:C_C	0.00187305	0.182078	0.00179982	10000
RP11-927P21.2	LRRC37A	ENSG00000266644	ENSG00000176681	17:62928040:A:C_C	0.00187379	0.182078	0.00159984	10000
USP4	GPX1P1	ENSG00000114316	ENSG00000197582	3:49200627:A:G_G	0.00195974	0.183393	0.0019998	10000
RP11-459O16.8	AC125634.1	ENSG00000276128	ENSG00000223602	9:43500542:G:T_T	0.00197291	0.183393	0.00179982	10000
CTB-92J24.2	AC022153.1	ENSG00000269397	ENSG00000267623	19:24396964:T:C_C	0.00198665	0.183393	0.00219978	10000
RP3-416J7.4	LINC00266-1	ENSG00000263667	ENSG00000149656	6:155815:T:C_C	0.00209773	0.190472	0.00189981	10000
RP11-419I17.1	AF131215.9	ENSG00000270154	ENSG00000269918	8:12241324:G:C_C	0.00223793	0.199924	0.00269973	10000
RP11-798K23.5	NA	ENSG00000253520	ENSG00000273549	5:179056736:G:A_A	0.00231834	0.201008	0.00269973	10000
ZSCAN26	ZNF192P2	ENSG00000197062	ENSG00000218016	6:29219059:C:T_T	0.00232264	0.201008	0.00209979	10000
PRKX	RP13-36G14.4	ENSG00000183943	ENSG00000270223	X:2699480:C:G_G	0.00236429	0.201465	0.00229977	10000
ZNF254	LINC00662	ENSG00000213096	ENSG00000261824	19:24458452:T:A_A	0.00243426	0.204284	0.00229977	10000
RP11-259G18.3	RP11-927P21.2	ENSG00000262539	ENSG00000266644	17:44365981:A:T_T	0.00268369	0.21254	0.00219978	10000
RP11-927P21.8	RP11-259G18.2	ENSG00000272134	ENSG00000262500	17:62918863:C:A_A	0.00269914	0.21254	0.00309969	10000
GTF2IRD2P1	GTF2IP1	ENSG00000214544	ENSG00000277053	7:72617556:AC:A_A	0.00271185	0.21254	0.00319968	10000
RP11-449H15.2	RP11-24B13.2	ENSG00000231838	ENSG00000270909	9:45127973:G:T_T	0.00283097	0.21254	0.0029997	10000
OR7E161P	RP11-351I21.6	ENSG00000206014	ENSG00000255556	8:10989206:T:C_C	0.00287794	0.21254	0.00309969	10000
ENPP7P1	RP11-351I21.7	ENSG00000249188	ENSG00000254423	8:7693235:G:T_T	0.00289083	0.21254	0.00329967	10000
ALG1L12P	ENPP7P1	ENSG00000250794	ENSG00000249188	8:12369141:G:A_A	0.00290812	0.21254	0.00319968	10000
BTNL2	HLA-DMB	ENSG00000204290	ENSG00000242574	6:31793526:AT:A_A	0.0029894	0.21254	0.00309969	10000
XXbac-BPG299F13.14	CYP21A2	ENSG00000271821	ENSG00000231852	6:30741226:C:T_T	0.0030049	0.21254	0.00309969	10000
MAP3K14-AS1	RP11-927P21.2	ENSG00000267278	ENSG00000266644	17:44173215:T:C_C	0.00305694	0.21254	0.00369963	10000
HLA-DRB1	HLA-DQB1	ENSG00000196126	ENSG00000179344	6:31577825:A:G_G	0.00306576	0.21254	0.00359964	10000
KPNB1	RPS26P8	ENSG00000108424	ENSG00000204652	17:44856485:C:T_T	0.00307446	0.21254	0.00309969	10000
GOLGA6L22	HERC2P2	ENSG00000277865	ENSG00000276550	15:23275279:G:A_A	0.00308944	0.21254	0.00289971	10000
CR848007.2	ANKRD20A4	ENSG00000170165	ENSG00000172014	9:44240388:C:T_T	0.00309549	0.21254	0.00329967	10000
CYP4F25P	CNN2P2	ENSG00000224106	ENSG00000227069	9:70134682:A:G_G	0.00313271	0.21254	0.00349965	10000
RP11-669E14.6	RP11-927P21.1	ENSG00000262372	ENSG00000265218	17:44153909:A:G_G	0.00314662	0.21254	0.00279972	10000
RPS26P8	RP11-798G7.8	ENSG00000204652	ENSG00000266918	17:44634673:T:C_C	0.00319104	0.212944	0.0029997	10000
TMEM72-AS1	AGAP7P	ENSG00000224812	ENSG00000264204	10:45914527:C:G_G	0.00348678	0.22991	0.00269973	10000
PFAS	KIAA0895L	ENSG00000178921	ENSG00000196123	17:8204506:C:G_G	0.00368904	0.237434	0.00379962	10000
TNXA	HLA-DMA	ENSG00000248290	ENSG00000204257	6:31597700:C:T_T	0.00370107	0.237434	0.00319968	10000
ABCC6	PKD1P1	ENSG00000091262	ENSG00000244257	16:15370083:G:A_A	0.00373391	0.237434	0.00359964	10000
TRIM51DP	FOLH1B	ENSG00000255190	ENSG00000134612	11:48958304:A:T_T	0.00387846	0.237434	0.00409959	10000
ALG1L11P	ENPP7P1	ENSG00000249889	ENSG00000249188	8:12052756:T:C_C	0.00391761	0.237434	0.00349965	10000
HIST1H3E	RP11-498P14.3	ENSG00000274750	ENSG00000242375	6:26505135:C:T_T	0.00399683	0.237434	0.00419958	10000
AC068587.2	FAM66E	ENSG00000238460	ENSG00000225725	8:12298795:G:C_C	0.0040008	0.237434	0.00429957	10000
RP11-24B13.2	RP11-449H15.2	ENSG00000270909	ENSG00000231838	9:43864614:C:T_T	0.00401894	0.237434	0.00419958	10000
VN1R108P	RP11-411B10.7	ENSG00000230772	ENSG00000279352	20:26216276:A:G_G	0.00402399	0.237434	0.00439956	10000
ZNF826P	PIR58033	ENSG00000231205	ENSG00000275540	19:19866113:C:G_G	0.00402957	0.237434	0.00469953	10000
PRSS51	RP11-351I21.6	ENSG00000253649	ENSG00000255556	8:10361363:A:C_C	0.00419723	0.240296	0.00379962	10000
PLXNB3	KDM5D	ENSG00000198753	ENSG00000012817	X:153589467:G:A_A	0.00424592	0.240296	0.00409959	10000
HCG27	VARS2	ENSG00000206344	ENSG00000137411	6:31907837:G:A_A	0.00427081	0.240296	0.00519948	10000
AC004951.6	SPDYE2B	ENSG00000228434	ENSG00000173678	7:44026555:A:G_G	0.00429083	0.240296	0.00419958	10000
ZDHHC8	PUDP	ENSG00000099904	ENSG00000130021	22:20657697:A:T_T	0.00429506	0.240296	0.00479952	10000
RNU1-122P	RP11-403I13.7	ENSG00000202408	ENSG00000226067	1:147994315:T:C_C	0.00441847	0.240827	0.00419958	10000
CNN2P2	CYP4F25P	ENSG00000227069	ENSG00000224106	9:42285033:A:G_G	0.00442253	0.240827	0.00469953	10000
RP11-556O5.6	RP11-419I17.1	ENSG00000268955	ENSG00000270154	8:8041163:C:T_T	0.00443499	0.240827	0.00479952	10000
NOTCH2NL	NBPF10	ENSG00000264343	ENSG00000271425	1:145552125:A:G_G	0.00456511	0.245251	0.00439956	10000
GTF2IP1	GTF2IRD2P1	ENSG00000277053	ENSG00000214544	7:74237612:G:T_T	0.00464868	0.245251	0.00449955	10000
CNN2P3	CBWD5	ENSG00000235832	ENSG00000147996	9:69153333:GTGTT:G_G	0.0046913	0.245251	0.00449955	10000
ENPP7P1	AF131215.9	ENSG00000249188	ENSG00000269918	8:8088933:T:C_C	0.00469359	0.245251	0.00469953	10000
LRRC37A	RP11-927P21.2	ENSG00000176681	ENSG00000266644	17:44674935:G:C_C	0.00477178	0.247007	0.00469953	10000
TBX1	INE1	ENSG00000184058	ENSG00000224975	22:20657565:A:C_C	0.00493846	0.249003	0.0049995	10000
RP11-419I17.1	RP11-556O5.6	ENSG00000270154	ENSG00000268955	8:11347289:T:G_G	0.00496699	0.249003	0.00559944	10000
GNB1L	ZFY	ENSG00000185838	ENSG00000067646	22:18879972:G:T_T	0.00501721	0.249003	0.00519948	10000
RP11-460N20.7	EEF1DP4	ENSG00000270948	ENSG00000213640	7:65344629:T:C_C	0.00503124	0.249003	0.00479952	10000
FOXS1	FRG1EP	ENSG00000179772	ENSG00000282995	20:29888618:T:TG_TG	0.00504371	0.249003	0.00549945	10000
AC026150.8	RP11-632K20.7	ENSG00000260693	ENSG00000223509	15:30730544:A:G_G	0.00512215	0.249003	0.00529947	10000
FAM66E	AC068587.2	ENSG00000225725	ENSG00000238460	8:7470780:G:T_T	0.00517879	0.249003	0.00479952	10000
RNU6-603P	RNF5P1	ENSG00000223335	ENSG00000253570	6:32526612:T:C_C	0.00519544	0.249003	0.0049995	10000
RP11-496H1.1	AC069513.4	ENSG00000249626	ENSG00000229178	3:197384613:G:A_A	0.00521496	0.249003	0.00489951	10000
RNA5SP283	RP11-475I24.3	ENSG00000202474	ENSG00000237357	9:66596998:G:A_A	0.00529299	0.249973	0.00569943	10000
AC026150.8	RP11-632K20.6	ENSG00000260693	ENSG00000261375	15:30771502:A:G_G	0.00532555	0.249973	0.00519948	10000
CLDN23	RP11-481A20.10	ENSG00000253958	ENSG00000254507	8:8581408:C:G_G	0.00542616	0.252556	0.0059994	10000
AF131215.9	RP11-419I17.1	ENSG00000269918	ENSG00000270154	8:10321881:A:G_G	0.00561153	0.256264	0.0049995	10000
RP11-481A20.10	AF131215.3	ENSG00000254507	ENSG00000254936	8:12142900:C:G_G	0.00565242	0.256264	0.00589941	10000
RP11-293E1.1	NA	ENSG00000265964	ENSG00000278770	17:43697863:T:C_C	0.00565966	0.256264	0.00559944	10000
RP6-206I17.1	NA	ENSG00000223804	ENSG00000281741	1:144320191:C:T_T	0.00569091	0.256264	0.00589941	10000
SFTPA2	BEND3P3	ENSG00000185303	ENSG00000278616	10:81459973:C:T_T	0.00575322	0.256981	0.00589941	10000
LRRC37A2	FAM215B	ENSG00000238083	ENSG00000232300	17:43610661:G:A_A	0.00582108	0.257932	0.00579942	10000
TBX1	MSC	ENSG00000184058	ENSG00000178860	22:18878221:A:G_G	0.00591337	0.258418	0.00609939	10000
NOMO2	AC138969.4	ENSG00000185164	ENSG00000183889	16:18484532:C:A_A	0.00592537	0.258418	0.00609939	10000
GTF2H2B	GTF2H2	ENSG00000226259	ENSG00000145736	5:69276521:G:A_A	0.00604187	0.2598	0.00569943	10000
AC026150.8	RP11-632K20.2	ENSG00000260693	ENSG00000254912	15:30771502:A:G_G	0.00605087	0.2598	0.00629937	10000
RP11-495P10.3	NA	ENSG00000224481	ENSG00000274265	1:147917461:A:C_C	0.00615905	0.262411	0.00639936	10000
CYP4F29P	NA	ENSG00000228314	ENSG00000277572	21:15242848:T:C_C	0.00633368	0.267791	0.00759924	10000
PRODH	PCDH11Y	ENSG00000100033	ENSG00000099715	22:18878224:T:G_G	0.00649563	0.270703	0.00649935	10000
LRRC37A17P	RP11-927P21.1	ENSG00000263142	ENSG00000265218	17:44324218:C:T_T	0.0066017	0.270703	0.00669933	10000
HIST2H2BA	NA	ENSG00000223345	ENSG00000281571	1:120777012:C:T_T	0.00668937	0.270703	0.00659934	10000
RP11-38L15.3	BMS1P7	ENSG00000231187	ENSG00000270025	10:47068905:G:A_A	0.00671014	0.270703	0.00649935	10000
RP11-351I21.7	ENPP7P1	ENSG00000254423	ENSG00000249188	8:12050833:C:A_A	0.00680138	0.270703	0.00649935	10000
HLA-L	HLA-DMA	ENSG00000243753	ENSG00000204257	6:30208351:A:G_G	0.00683323	0.270703	0.00689931	10000
FAM86B1	FAM66E	ENSG00000186523	ENSG00000225725	8:12219599:G:A_A	0.00685702	0.270703	0.00729927	10000
RP11-981G7.3	RP11-481A20.10	ENSG00000253678	ENSG00000254507	8:10063879:C:A_A	0.00688079	0.270703	0.00729927	10000
RP11-589F5.4	SERF1A	ENSG00000253366	ENSG00000172058	5:69081633:TATATA:T_T	0.00691587	0.270703	0.00729927	10000
CTB-92J24.2	CTC-459F4.6	ENSG00000269397	ENSG00000267264	19:24424811:T:A_A	0.0069333	0.270703	0.00689931	10000
CBWD7	NA	ENSG00000215126	ENSG00000275160	9:42454446:C:T_T	0.00694016	0.270703	0.0069993	10000
CCDC43	ARL17A	ENSG00000180329	ENSG00000185829	17:43575946:G:T_T	0.00701465	0.271695	0.00769923	10000
C6orf10	BTNL2	ENSG00000204296	ENSG00000204290	6:31355318:T:C_C	0.0071963	0.275035	0.0069993	10000
HERC2P9	HERC2P2	ENSG00000206149	ENSG00000276550	15:28450392:G:A_A	0.00730842	0.275035	0.0069993	10000
ANKRD20A4	RP11-236F9.2	ENSG00000172014	ENSG00000228522	9:68703175:C:T_T	0.00731301	0.275035	0.00739926	10000
RP11-798G7.8	LRRC37A2	ENSG00000266918	ENSG00000238083	17:43399058:G:C_C	0.00738572	0.275035	0.00779922	10000
GXYLT1P4	FOXD4L4	ENSG00000275026	ENSG00000184659	9:42870224:C:T_T	0.00740558	0.275035	0.00749925	10000
RP11-219A15.1	RP11-92B11.3	ENSG00000266302	ENSG00000264673	17:15639906:C:T_T	0.00752638	0.275035	0.00739926	10000
NOMO1	PKD1P1	ENSG00000103512	ENSG00000244257	16:14971611:C:T_T	0.00753053	0.275035	0.00789921	10000
RP11-496H1.1	MUC20P1	ENSG00000249626	ENSG00000224769	3:197393927:C:A_A	0.00753773	0.275035	0.00709929	10000
SPPL2C	RP11-798G7.8	ENSG00000185294	ENSG00000266918	17:44674935:G:C_C	0.00759265	0.275035	0.00769923	10000
PLAC9	BEND3P1	ENSG00000189129	ENSG00000231345	10:81440163:A:ATCT_ATCT	0.00759745	0.275035	0.00779922	10000
HLA-DQB2	RNF5P1	ENSG00000232629	ENSG00000253570	6:32587001:C:T_T	0.00781427	0.281047	0.00869913	10000
PPP1R3G	HSFY3P	ENSG00000219607	ENSG00000227289	6:4225023:A:C_C	0.00793604	0.282386	0.00819918	10000
HLA-DMA	RNF5P1	ENSG00000204257	ENSG00000253570	6:32503151:T:C_C	0.00800738	0.282386	0.00809919	10000
AC126544.4	RP11-927P21.1	ENSG00000282774	ENSG00000265218	17:44603027:T:A_A	0.00806157	0.282386	0.00879912	10000
HLA-DQA2	FLOT1	ENSG00000237541	ENSG00000137312	6:32799845:T:G_G	0.00809162	0.282386	0.00849915	10000
RP11-195E2.1	GUSBP3	ENSG00000230847	ENSG00000253203	5:69989139:C:T_T	0.0081064	0.282386	0.00839916	10000
PPP1R3G	TMSB4Y	ENSG00000219607	ENSG00000154620	6:4224995:G:A_A	0.00824281	0.285343	0.00829917	10000
XXbac-BPG283O16.9	BTN3A2	ENSG00000280128	ENSG00000186470	6:29537224:A:G_G	0.00832558	0.285572	0.00879912	10000
CTD-3092A11.1	GOLGA8R	ENSG00000215302	ENSG00000186399	15:31725223:G:A_A	0.00839021	0.285572	0.00829917	10000
CLDN23	AF131215.9	ENSG00000253958	ENSG00000269918	8:8595838:T:G_G	0.00850413	0.285572	0.00819918	10000
ZDHHC8	PDE4C	ENSG00000099904	ENSG00000105650	22:20657697:A:T_T	0.00858078	0.285572	0.00869913	10000
GTF2H2B	RP11-195E2.1	ENSG00000226259	ENSG00000230847	5:69081633:TATATA:T_T	0.00862814	0.285572	0.0079992	10000
XKR7	FRG1EP	ENSG00000260903	ENSG00000282995	20:30025195:G:A_A	0.00870064	0.285572	0.00879912	10000
AC125634.1	CNN2P4	ENSG00000223602	ENSG00000213816	9:69866612:C:A_A	0.00871656	0.285572	0.00869913	10000
ZFP57	HLA-DMA	ENSG00000204644	ENSG00000204257	6:30075103:T:G_G	0.00874481	0.285572	0.0089991	10000
F8	USP9Y	ENSG00000185010	ENSG00000114374	X:154934986:G:A_A	0.00876406	0.285572	0.00859914	10000
AGBL2	FOLH1B	ENSG00000165923	ENSG00000134612	11:48276489:T:A_A	0.00876504	0.285572	0.00849915	10000
RP11-375N15.2	AF131215.6	ENSG00000272267	ENSG00000254839	8:8672579:A:G_G	0.00888101	0.286247	0.00939906	10000
RP11-981G7.3	FAM86B3P	ENSG00000253678	ENSG00000173295	8:9558448:T:C_C	0.00889107	0.286247	0.0089991	10000
ZDHHC8	ZFX	ENSG00000099904	ENSG00000005889	22:20657697:A:T_T	0.0089568	0.286247	0.00949905	10000
ZNF568	RP11-392P7.6	ENSG00000198453	ENSG00000247498	19:37822594:C:T_T	0.00899247	0.286247	0.00889911	10000
RP11-156P1.3	DND1P1	ENSG00000262879	ENSG00000264070	17:44673376:A:G_G	0.00904453	0.286259	0.00939906	10000
ZNF260	ZNF793	ENSG00000254004	ENSG00000188227	19:36997147:C:T_T	0.00910083	0.286405	0.00839916	10000
RP11-216M21.1	AC125634.1	ENSG00000237846	ENSG00000223602	9:43047955:C:A_A	0.00925558	0.289629	0.00909909	10000
RP11-927P21.2	RP11-259G18.3	ENSG00000266644	ENSG00000262539	17:62870703:A:G_G	0.00942704	0.291194	0.00979902	10000
ABC7-42404400C24.1	CTSLP2	ENSG00000277758	ENSG00000280913	10:46653933:G:A_A	0.00947293	0.291194	0.00949905	10000
PRKX	GYG2P1	ENSG00000183943	ENSG00000206159	X:2699476:A:T_T	0.00947317	0.291194	0.00909909	10000
AC138969.4	RP11-958N24.2	ENSG00000183889	ENSG00000227827	16:15434069:C:T_T	0.00954743	0.291194	0.00949905	10000
CDC27	RP11-798G7.8	ENSG00000004897	ENSG00000266918	17:44759766:G:A_A	0.00956847	0.291194	0.00909909	10000
LINC00599	XKR6	ENSG00000253230	ENSG00000171044	8:9165654:A:C_C	0.00982746	0.297442	0.00979902	10000
RP4-756H11.3	PSPHP1	ENSG00000226824	ENSG00000226278	7:65249920:G:T_T	0.00998563	0.299316	0.00979902	10000
F8A1	TXLNGY	ENSG00000277203	ENSG00000131002	X:154983133:C:T_T	0.01	0.299316	0.010099	10000
XXbac-BPG299F13.14	C4A	ENSG00000271821	ENSG00000244731	6:30741305:G:C_C	0.0101	0.299316	0.010199	10000
DND1P1	RP11-156P1.3	ENSG00000264070	ENSG00000262879	17:43794899:C:T_T	0.0102	0.299316	0.010299	10000
GPAT2	ZFX	ENSG00000186281	ENSG00000005889	2:96627015:A:C_C	0.0102589	0.299316	0.00979902	10000
RNF151	RPS2P5	ENSG00000179580	ENSG00000240342	16:2033373:A:G_G	0.0103	0.299316	0.010399	10000
ERV3-1	EEF1DP4	ENSG00000213462	ENSG00000213640	7:65344637:C:CT_CT	0.0104	0.299316	0.010499	10000
CTSLP2	ABC7-42404400C24.1	ENSG00000280913	ENSG00000277758	10:48820754:C:T_T	0.0104415	0.299316	0.00989901	10000
LRRC37A3	CRHR1-IT1	ENSG00000176809	ENSG00000204650	17:62915681:C:CG_CG	0.0105	0.299316	0.0105989	10000
CRHR1-IT1	RP11-798G7.8	ENSG00000204650	ENSG00000266918	17:44673376:A:G_G	0.0105	0.299316	0.0105989	10000
XXbac-B461K10.4	TXLNGY	ENSG00000093100	ENSG00000131002	22:18883763:G:T_T	0.0106	0.299316	0.0106989	10000
TBX1	SPESP1	ENSG00000184058	ENSG00000258484	22:20657527:G:C_C	0.0106	0.299316	0.0106989	10000
RP11-707O23.5	RP11-927P21.1	ENSG00000263503	ENSG00000265218	17:44338011:C:T_T	0.0107	0.299316	0.0107989	10000
RP11-4L24.4	GLIDR	ENSG00000279561	ENSG00000278175	9:45435564:G:A_A	0.0107	0.299316	0.0107989	10000
HCN2	POLRMTP1	ENSG00000099822	ENSG00000266066	19:619913:T:C_C	0.0108	0.300595	0.0108989	10000
PSTPIP1	AC090519.1	ENSG00000140368	ENSG00000196274	15:76757347:T:C_C	0.011	0.304631	0.0110989	10000
RP11-259G18.3	CRHR1-IT1	ENSG00000262539	ENSG00000204650	17:44767895:G:A_A	0.0111	0.305871	0.0111989	10000
RP11-177H2.1	FAM85B	ENSG00000280294	ENSG00000253893	8:11354933:A:G_G	0.0113	0.308289	0.0113989	10000
RP11-293E1.2	ARL17A	ENSG00000265547	ENSG00000185829	17:43526591:C:CAGCTCG_CAGCTCG	0.0114	0.308289	0.0114989	10000
CENPBD1P1	RP11-395L14.18	ENSG00000213753	ENSG00000279267	19:59016790:G:A_A	0.0115	0.308289	0.0115988	10000
RP11-250H24.2	ANKRD20A2	ENSG00000229156	ENSG00000183148	9:69455311:A:G_G	0.0115	0.308289	0.0115988	10000
GS1-124K5.11	EEF1DP4	ENSG00000229180	ENSG00000213640	7:65823230:G:A_A	0.0115	0.308289	0.0115988	10000
XXbac-BPG181B23.7	HLA-DQB1	ENSG00000272221	ENSG00000179344	6:31102884:T:C_C	0.0116	0.308289	0.0116988	10000
GXYLT1P4	CYP4F25P	ENSG00000275026	ENSG00000224106	9:42309747:C:A_A	0.0116	0.308289	0.0116988	10000
RNF39	C4A	ENSG00000204618	ENSG00000244731	6:29903991:G:A_A	0.0117	0.308289	0.0117988	10000
ENPP7P1	ALG1L12P	ENSG00000249188	ENSG00000250794	8:7773190:T:G_G	0.0117	0.308289	0.0117988	10000
SMTNL1	RN7SL605P	ENSG00000214872	ENSG00000265566	11:57269429:TCTAAACACAACAGCCCC:T_T	0.0118	0.308289	0.0118988	10000
RP11-479O9.4	ZNF117	ENSG00000272693	ENSG00000152926	7:65505661:T:C_C	0.0118	0.308289	0.0118988	10000
RBM5	GPX1P1	ENSG00000003756	ENSG00000197582	3:50052867:T:A_A	0.012	0.312042	0.0120988	10000
RP11-259G18.1	RP11-927P21.2	ENSG00000261575	ENSG00000266644	17:44603027:T:A_A	0.0121	0.313172	0.0121988	10000
PM20D1	RAB7B	ENSG00000162877	ENSG00000276600	1:205701870:C:T_T	0.0126	0.323094	0.0126987	10000
ARL17B	CRHR1-IT1	ENSG00000228696	ENSG00000204650	17:44753140:A:G_G	0.0126	0.323094	0.0126987	10000
PSORS1C1	HLA-DMB	ENSG00000204540	ENSG00000242574	6:31311318:A:G_G	0.0129	0.329262	0.0129987	10000
FMNL1	RP11-927P21.2	ENSG00000184922	ENSG00000266644	17:43695263:T:G_G	0.0132	0.335374	0.0132987	10000
CNN2P4	AC125634.1	ENSG00000213816	ENSG00000223602	9:43597989:AACTT:A_A	0.0133	0.336371	0.0133987	10000
MAPT-IT1	LRRC37A2	ENSG00000279685	ENSG00000238083	17:43573061:T:C_C	0.0134	0.336816	0.0134987	10000
LRRC37A3	RP11-156P1.3	ENSG00000176809	ENSG00000262879	17:62919918:G:T_T	0.0135	0.336816	0.0135986	10000
MAPT	RPS26P8	ENSG00000186868	ENSG00000204652	17:44771859:G:A_A	0.0135	0.336816	0.0135986	10000
C1QTNF4	NA	ENSG00000172247	ENSG00000280615	11:47378901:TCA:T_T	0.0137	0.338613	0.0137986	10000
LA16c-431H6.6	RPS2P5	ENSG00000261732	ENSG00000240342	16:2024131:T:C_C	0.0137	0.338613	0.0137986	10000
CNGA4	NONOP2	ENSG00000132259	ENSG00000237522	11:6289118:A:G_G	0.0139	0.338613	0.0139986	10000
SCAND2P	UBE2Q2P6	ENSG00000176700	ENSG00000275695	15:84867631:T:G_G	0.0139	0.338613	0.0139986	10000
FRG1KP	NA	ENSG00000280286	ENSG00000274869	9:67987324:A:G_G	0.0139	0.338613	0.0139986	10000
RP11-236F9.2	ANKRD20A4	ENSG00000228522	ENSG00000172014	9:66599631:A:G_G	0.014	0.338613	0.0140986	10000
RP11-262H14.5	NA	ENSG00000229422	ENSG00000274869	9:67297125:A:T_T	0.014	0.338613	0.0140986	10000
FAM66E	FAM86B1	ENSG00000225725	ENSG00000186523	8:7267239:G:A_A	0.0143	0.344366	0.0143986	10000
F8	SMIM24	ENSG00000185010	ENSG00000095932	X:154969038:T:C_C	0.0146	0.348559	0.0146985	10000
STK19B	BCS1L	ENSG00000250535	ENSG00000074582	6:32557418:A:G_G	0.0146	0.348559	0.0146985	10000
DNM1P51	CSPG4P12	ENSG00000235370	ENSG00000259295	15:84673536:C:G_G	0.0147	0.348823	0.0147985	10000
LINC01597	FRG1EP	ENSG00000205611	ENSG00000282995	20:30015338:G:A_A	0.0148	0.348823	0.0148985	10000
RP11-259G18.2	RPS26P8	ENSG00000262500	ENSG00000204652	17:44711695:T:G_G	0.0148	0.348823	0.0148985	10000
RP11-798G7.8	RP11-927P21.2	ENSG00000266918	ENSG00000266644	17:44606576:A:G_G	0.0149	0.349692	0.0149985	10000
LINC01535	CTD-2162K18.4	ENSG00000226686	ENSG00000267260	19:38277584:TTAA:T_T	0.015	0.350554	0.0150985	10000
PPP1R3G	PCDH11Y	ENSG00000219607	ENSG00000099715	6:4225023:A:C_C	0.0153	0.354572	0.0153985	10000
AL022393.9	BTN3A2	ENSG00000280107	ENSG00000186470	6:28183242:T:TTCTGAGGAA_TTCTGAGGAA	0.0153	0.354572	0.0153985	10000
LY6G5C	RNF5P1	ENSG00000204428	ENSG00000253570	6:31310372:C:T_T	0.0154	0.355403	0.0154985	10000
RP11-375N15.2	RP11-351I21.6	ENSG00000272267	ENSG00000255556	8:9117153:CA:C_C	0.0155	0.356226	0.0155984	10000
TBX1	PNPLA4	ENSG00000184058	ENSG00000006757	22:20657530:T:A_A	0.0158	0.361621	0.0158984	10000
KANSL1-AS1	CTD-2020K17.3	ENSG00000214401	ENSG00000233175	17:44332959:C:T_T	0.016	0.364691	0.0160984	10000
RP11-154P18.2	CNN2P2	ENSG00000233765	ENSG00000227069	9:70159507:T:C_C	0.0161	0.365466	0.0161984	10000
FAM50A	CTC-575D19.1	ENSG00000071859	ENSG00000233913	X:153651003:A:G_G	0.0162	0.366236	0.0162984	10000
PRKX	INE1	ENSG00000183943	ENSG00000224975	X:2697599:C:A_A	0.0165	0.371474	0.0165983	10000
RP11-1415C14.3	GTF2H2	ENSG00000253816	ENSG00000145736	5:69291044:A:G_G	0.0166	0.371474	0.0166983	10000
CDC27	LRRC37A4P	ENSG00000004897	ENSG00000214425	17:44759766:G:A_A	0.0167	0.371474	0.0167983	10000
PPIA	PPIAP29	ENSG00000196262	ENSG00000214975	7:44819645:C:T_T	0.0167	0.371474	0.0167983	10000
GOLGA8S	GOLGA8IP	ENSG00000261739	ENSG00000277561	15:23264144:A:G_G	0.0169	0.372169	0.0169983	10000
F8A1	ARSEP1	ENSG00000277203	ENSG00000224060	X:154981382:A:AT_AT	0.0169	0.372169	0.0169983	10000
RP11-632K20.7	AC026150.6	ENSG00000223509	ENSG00000260784	15:32823771:T:C_C	0.017	0.372169	0.0170983	10000
RP11-146D12.2	GXYLT1P5	ENSG00000240240	ENSG00000276591	9:42336294:C:T_T	0.017	0.372169	0.0170983	10000
SCARNA15	GOLGA6L10	ENSG00000252690	ENSG00000278662	15:82626055:G:A_A	0.0171	0.372884	0.0171983	10000
MAPT	LRRC37A2	ENSG00000186868	ENSG00000238083	17:43471489:G:A_A	0.0173	0.374298	0.0173983	10000
RP11-259G18.1	RP11-798G7.6	ENSG00000261575	ENSG00000267198	17:44674935:G:C_C	0.0173	0.374298	0.0173983	10000
AC125634.1	RP11-216M21.1	ENSG00000223602	ENSG00000237846	9:70101615:G:A_A	0.0175	0.37569	0.0175982	10000
HLA-K	RNF5P1	ENSG00000230795	ENSG00000253570	6:29778174:T:C_C	0.0175	0.37569	0.0175982	10000
AC069513.4	AC132008.1	ENSG00000229178	ENSG00000213519	3:195714726:T:TA_TA	0.0178	0.379078	0.0178982	10000
RNA5SP311	CTGLF12P	ENSG00000238405	ENSG00000265018	10:47344345:G:A_A	0.0178	0.379078	0.0178982	10000
FAM106A	KRT17P1	ENSG00000213077	ENSG00000131885	17:18406264:G:C_C	0.018	0.379078	0.0180982	10000
AC132008.1	AC069513.4	ENSG00000213519	ENSG00000229178	3:197393927:C:A_A	0.018	0.379078	0.0180982	10000
NCKIPSD	AMT	ENSG00000213672	ENSG00000145020	3:48268509:G:T_T	0.018	0.379078	0.0180982	10000
CNN2P2	RP11-154P18.2	ENSG00000227069	ENSG00000233765	9:43179905:G:A_A	0.0181	0.37974	0.0181982	10000
FAM90A25P	FAM66E	ENSG00000251402	ENSG00000225725	8:12311645:G:A_A	0.0182	0.380397	0.0182982	10000
RP11-374M1.2	RP11-459O16.8	ENSG00000231527	ENSG00000276128	9:44436134:A:G_G	0.0183	0.381049	0.0183982	10000
RP11-54O7.18	FBXW9	ENSG00000273443	ENSG00000132004	1:1014864:T:A_A	0.0184	0.381696	0.0184982	10000
RP11-927P21.1	RP11-707O23.5	ENSG00000265218	ENSG00000263503	17:62910944:T:C_C	0.0185	0.382339	0.0185981	10000
CTD-2020K17.3	RP11-927P21.2	ENSG00000233175	ENSG00000266644	17:43778768:C:T_T	0.0187	0.385036	0.0187981	10000
LINC00266-1	RP3-416J7.4	ENSG00000149656	ENSG00000263667	20:62934325:G:GATATATAATATATAATATTAT_GATATATAATATATAATATTAT	0.0189	0.386705	0.0189981	10000
IQCG	RP11-34P13.13	ENSG00000114473	ENSG00000241860	3:197923844:C:T_T	0.019	0.386705	0.0190981	10000
RP11-177H2.1	FAM86B3P	ENSG00000280294	ENSG00000173295	8:10848725:T:C_C	0.019	0.386705	0.0190981	10000
RPS26P8	NA	ENSG00000204652	ENSG00000278770	17:44634643:T:C_C	0.0191	0.386705	0.0191981	10000
RP11-206L10.2	FAM157C	ENSG00000228327	ENSG00000260528	1:250425:A:G_G	0.0192	0.386705	0.0192981	10000
RP11-395L14.18	CENPBD1P1	ENSG00000279267	ENSG00000213753	2:114364382:T:A_A	0.0192	0.386705	0.0192981	10000
AC114730.3	AC137934.1	ENSG00000224272	ENSG00000260923	2:243060100:G:A_A	0.0193	0.387311	0.0193981	10000
FGF22	POLRMTP1	ENSG00000070388	ENSG00000266066	19:616999:A:G_G	0.0195	0.388509	0.019598	10000
CRHR1-IT1	ARL17A	ENSG00000204650	ENSG00000185829	17:43463493:A:C_C	0.0195	0.388509	0.019598	10000
CNTNAP2	RP11-155D18.13	ENSG00000174469	ENSG00000280422	7:148959746:T:C_C	0.0198	0.389474	0.019898	10000
LINC01535	RP11-392P7.6	ENSG00000226686	ENSG00000247498	19:38040858:C:T_T	0.0198	0.389474	0.019898	10000
RP11-540B6.6	GOLGA8N	ENSG00000270015	ENSG00000232653	15:30763319:CG:C_C	0.0198	0.389474	0.019898	10000
KANSL1-AS1	FAM215B	ENSG00000214401	ENSG00000232300	17:43574972:T:G_G	0.0199	0.389474	0.019998	10000
ARL17B	LRRC37A4P	ENSG00000228696	ENSG00000214425	17:44673376:A:G_G	0.0199	0.389474	0.019998	10000
LRRC37A2	RP11-798G7.8	ENSG00000238083	ENSG00000266918	17:44633501:G:A_A	0.02	0.389835	0.020098	10000
ACCS	UBLCP1	ENSG00000110455	ENSG00000164332	11:44237677:C:T_T	0.0201	0.389835	0.020198	10000
SLC27A5	RP11-395L14.18	ENSG00000083807	ENSG00000279267	19:59028585:G:A_A	0.0202	0.389835	0.020298	10000
RP11-24B13.2	NA	ENSG00000270909	ENSG00000274869	9:43681737:A:G_G	0.0202	0.389835	0.020298	10000
RP11-87H9.4	RP11-111F5.2	ENSG00000280077	ENSG00000231995	9:69856009:C:T_T	0.0203	0.390405	0.020398	10000
CYP21A2	HLA-DRB5	ENSG00000231852	ENSG00000198502	6:31330546:T:G_G	0.0204	0.39097	0.020498	10000
HCG20	RNF5P1	ENSG00000228022	ENSG00000253570	6:31195218:C:T_T	0.0205	0.391304	0.0205979	10000
RP11-927P21.2	RP11-259G18.1	ENSG00000266644	ENSG00000261575	17:62915848:G:A_A	0.0206	0.391304	0.0206979	10000
ARL17A	CRHR1-IT1	ENSG00000185829	ENSG00000204650	17:44740976:G:A_A	0.0207	0.391304	0.0207979	10000
GUSBP3	RP11-195E2.1	ENSG00000253203	ENSG00000230847	5:69276521:G:A_A	0.0207	0.391304	0.0207979	10000
GMPPB	GPX1P1	ENSG00000173540	ENSG00000197582	3:49788588:T:TG_TG	0.0209	0.393741	0.0209979	10000
GTF2H1	LDHAP4	ENSG00000110768	ENSG00000214110	11:18447360:G:A_A	0.021	0.394284	0.0210979	10000
CNN2P4	NA	ENSG00000213816	ENSG00000276462	9:43772605:G:C_C	0.0212	0.394657	0.0212979	10000
FBXW10	KRT17P6	ENSG00000171931	ENSG00000231645	17:18297214:C:G_G	0.0213	0.394657	0.0213979	10000
RNU6-729P	AF131215.9	ENSG00000207128	ENSG00000269918	8:9793601:A:C_C	0.0215	0.394657	0.0215978	10000
HLA-DQA2	HLA-DMB	ENSG00000237541	ENSG00000242574	6:31822185:C:T_T	0.0216	0.394657	0.0216978	10000
PGM5P2	ANKRD20A7P	ENSG00000277778	ENSG00000236816	9:68355846:G:C_C	0.0217	0.394657	0.0217978	10000
ABT1	RP11-498P14.3	ENSG00000146109	ENSG00000242375	6:26677653:T:A_A	0.0219	0.394657	0.0219978	10000
AC145124.2	FAM86B3P	ENSG00000255495	ENSG00000173295	8:12312617:G:A_A	0.0219	0.394657	0.0219978	10000
FAM66E	FAM90A25P	ENSG00000225725	ENSG00000251402	8:7898354:C:G_G	0.022	0.394657	0.0220978	10000
TMLHE-AS1	TTTY15	ENSG00000224533	ENSG00000233864	X:154938547:T:C_C	0.0223	0.394657	0.0223978	10000
ZDHHC8	ZRSR2	ENSG00000099904	ENSG00000169249	22:20657697:A:T_T	0.0224	0.394657	0.0224978	10000
AQP7P1	ANKRD20A2	ENSG00000186466	ENSG00000183148	9:67859136:G:A_A	0.0224	0.394657	0.0224978	10000
RP11-163O19.3	RP11-738O11.13	ENSG00000254800	ENSG00000254547	11:49750010:A:G_G	0.0224	0.394657	0.0224978	10000
C20orf203	STT3B	ENSG00000198547	ENSG00000163527	20:31236430:G:A_A	0.0225	0.394657	0.0225977	10000
CLEC18C	NPIPB15	ENSG00000157335	ENSG00000196436	16:70221611:T:G_G	0.0226	0.394657	0.0226977	10000
ENPP7P1	ALG1L11P	ENSG00000249188	ENSG00000249889	8:7900207:G:A_A	0.0226	0.394657	0.0226977	10000
RP11-556O5.6	RP11-481A20.10	ENSG00000268955	ENSG00000254507	8:8664679:G:A_A	0.0226	0.394657	0.0226977	10000
GOSR1	MT-RNR1	ENSG00000108587	ENSG00000211459	17:28996904:G:GTATTTT_GTATTTT	0.0227	0.394657	0.0227977	10000
RNU1-122P	NA	ENSG00000202408	ENSG00000278882	1:147994315:T:C_C	0.0227	0.394657	0.0227977	10000
CYP21A2	FLOT1	ENSG00000231852	ENSG00000137312	6:32799845:T:G_G	0.0227	0.394657	0.0227977	10000
PRODH	USP9Y	ENSG00000100033	ENSG00000114374	22:18878224:T:G_G	0.0228	0.394657	0.0228977	10000
EMB	RP11-484L7.1	ENSG00000170571	ENSG00000250422	5:49872572:G:T_T	0.0228	0.394657	0.0228977	10000
CCDC144B	KRT16P6	ENSG00000154874	ENSG00000226145	17:18491827:A:G_G	0.023	0.394657	0.0230977	10000
VPS9D1-AS1	RPL13P12	ENSG00000261373	ENSG00000215030	16:89579871:T:C_C	0.023	0.394657	0.0230977	10000
MAPT-IT1	NA	ENSG00000279685	ENSG00000278770	17:44084335:TAAAATAAAATAAATA:T_T	0.023	0.394657	0.0230977	10000
RP11-43F13.1	AHRR	ENSG00000188002	ENSG00000063438	5:1611565:T:C_C	0.0231	0.394657	0.0231977	10000
ST3GAL2	NPIPB15	ENSG00000157350	ENSG00000196436	16:70513384:C:G_G	0.0232	0.394657	0.0232977	10000
PRKX	PCDHGA11	ENSG00000183943	ENSG00000253873	X:2697599:C:A_A	0.0232	0.394657	0.0232977	10000
TBX1	RP13-216E22.4	ENSG00000184058	ENSG00000228906	22:20657536:C:A_A	0.0232	0.394657	0.0232977	10000
PMS2P5	GTF2IRD2P1	ENSG00000123965	ENSG00000214544	7:74208459:T:A_A	0.0233	0.394657	0.0233977	10000
KRT17P2	RP11-219A15.1	ENSG00000186831	ENSG00000266302	17:18406264:G:C_C	0.0233	0.394657	0.0233977	10000
RP11-236F9.2	RP11-15J10.1	ENSG00000228522	ENSG00000204778	9:67311588:C:G_G	0.0233	0.394657	0.0233977	10000
RP11-4L24.3	RP11-459O16.8	ENSG00000275450	ENSG00000276128	9:45714170:A:G_G	0.0233	0.394657	0.0233977	10000
RP11-481A20.10	RP11-556O5.6	ENSG00000254507	ENSG00000268955	8:11457248:T:C_C	0.0235	0.395862	0.0235976	10000
ZDHHC8	RNU2-57P	ENSG00000099904	ENSG00000252468	22:20657697:A:T_T	0.0236	0.395862	0.0236976	10000
ZNF14	PIR58033	ENSG00000105708	ENSG00000275540	19:19824556:C:T_T	0.0236	0.395862	0.0236976	10000
ATP6V1G2	RNF5P1	ENSG00000213760	ENSG00000253570	6:32501811:T:C_C	0.0238	0.395862	0.0238976	10000
HNRNPCP7	A2M-AS1	ENSG00000228653	ENSG00000245105	7:63804245:C:G_G	0.0238	0.395862	0.0238976	10000
GTF2I	CASTOR2	ENSG00000263001	ENSG00000274070	7:74499316:G:A_A	0.0238	0.395862	0.0238976	10000
IQCG	FAM157C	ENSG00000114473	ENSG00000260528	3:197923844:C:T_T	0.0243	0.401677	0.0243976	10000
ISG15	CTC-338M12.13	ENSG00000187608	ENSG00000274525	1:690329:C:T_T	0.0243	0.401677	0.0243976	10000
PSORS1C1	HLA-DQA1	ENSG00000204540	ENSG00000196735	6:31323500:CCT:C_C	0.0244	0.401677	0.0244976	10000
TBX1	MAFIP	ENSG00000184058	ENSG00000278212	22:18878326:G:T_T	0.0246	0.401677	0.0246975	10000
ENPP7P1	FAM66D	ENSG00000249188	ENSG00000255052	8:8057647:G:T_T	0.0247	0.401677	0.0247975	10000
C22orf39	PNPLA4	ENSG00000242259	ENSG00000006757	22:18721714:T:C_C	0.0248	0.401677	0.0248975	10000
POU5F1P6	POU5F1P6	ENSG00000242551	ENSG00000277250	3:128314351:TA:T_T	0.0248	0.401677	0.0248975	10000
RPS26P8	RP11-707O23.1	ENSG00000204652	ENSG00000280022	17:44681062:A:G_G	0.025	0.401677	0.0250975	10000
UBE2Q2L	UBE2Q2P6	ENSG00000259511	ENSG00000275695	15:85062756:A:G_G	0.025	0.401677	0.0250975	10000
TMLHE-AS1	USP9Y	ENSG00000224533	ENSG00000114374	X:154934986:G:A_A	0.0251	0.401677	0.0251975	10000
ANKRD20A7P	AC125634.1	ENSG00000236816	ENSG00000223602	9:43607064:C:A_A	0.0251	0.401677	0.0251975	10000
LY6G5C	HLA-DMA	ENSG00000204428	ENSG00000204257	6:31331095:G:A_A	0.0252	0.401677	0.0252975	10000
RP11-4L24.3	NA	ENSG00000275450	ENSG00000276462	9:46031090:G:A_A	0.0252	0.401677	0.0252975	10000
FAM86B3P	AC145124.2	ENSG00000173295	ENSG00000255495	8:7464150:G:C_C	0.0253	0.401677	0.0253975	10000
LINC01012	RP11-498P14.3	ENSG00000281706	ENSG00000242375	6:26971893:AT:A_A	0.0253	0.401677	0.0253975	10000
MIR4477B	ANKRD20A2	ENSG00000266017	ENSG00000183148	9:67949409:C:A_A	0.0254	0.401677	0.0254975	10000
RP11-252A24.2	PDPR	ENSG00000214331	ENSG00000090857	16:74238139:A:T_T	0.0255	0.401677	0.0255974	10000
CICP27	WASH3P	ENSG00000233750	ENSG00000185596	1:62777:A:T_T	0.0255	0.401677	0.0255974	10000
RPS26P8	RP11-259G18.2	ENSG00000204652	ENSG00000262500	17:43278576:C:T_T	0.0256	0.401677	0.0256974	10000
AC093616.4	AC125232.1	ENSG00000234231	ENSG00000231259	2:88283386:T:C_C	0.0256	0.401677	0.0256974	10000
AGAP10P	AGAP7P	ENSG00000230869	ENSG00000264204	10:46317756:C:A_A	0.0258	0.403098	0.0258974	10000
RP11-798G7.6	RP11-156P1.3	ENSG00000267198	ENSG00000262879	17:43931855:GAGAGAGAC:G_G	0.026	0.403098	0.0260974	10000
GNB1L	UTY	ENSG00000185838	ENSG00000183878	22:18879972:G:T_T	0.0261	0.403098	0.0261974	10000
LRRC37A2	RP11-583F2.1	ENSG00000238083	ENSG00000264057	17:44434309:C:T_T	0.0261	0.403098	0.0261974	10000
SLC35G5	FAM86B3P	ENSG00000177710	ENSG00000173295	8:11832769:T:C_C	0.0262	0.403098	0.0262974	10000
PRKX	MAFIP	ENSG00000183943	ENSG00000278212	X:2697599:C:A_A	0.0262	0.403098	0.0262974	10000
F8A1	ZFX	ENSG00000277203	ENSG00000005889	X:154938547:T:C_C	0.0262	0.403098	0.0262974	10000
MEIS3P1	ZNF286B	ENSG00000179277	ENSG00000249459	17:15808598:T:TG_TG	0.0263	0.403515	0.0263974	10000
ALG1L11P	AF131215.9	ENSG00000249889	ENSG00000269918	8:12196037:A:G_G	0.0265	0.404344	0.0265973	10000
RP11-669E14.6	LRRC37A4P	ENSG00000262372	ENSG00000214425	17:44765919:C:G_G	0.0265	0.404344	0.0265973	10000
STH	FAM215B	ENSG00000256762	ENSG00000232300	17:43610661:G:A_A	0.0268	0.406681	0.0268973	10000
RP11-669E14.6	NA	ENSG00000262372	ENSG00000278770	17:44588403:A:G_G	0.0268	0.406681	0.0268973	10000
CRHR1-IT1	RPS26P8	ENSG00000204650	ENSG00000204652	17:44711695:T:G_G	0.027	0.407483	0.0270973	10000
FAM90A2P	AF131215.2	ENSG00000205879	ENSG00000255310	8:12012434:C:G_G	0.027	0.407483	0.0270973	10000
ZDHHC8	USP9X	ENSG00000099904	ENSG00000124486	22:20657697:A:T_T	0.0271	0.407881	0.0271973	10000
HLA-C	C4A	ENSG00000204525	ENSG00000244731	6:30901220:CCCTCCCTT:C_C	0.0273	0.408353	0.0273973	10000
MSR1	RP11-490B18.5	ENSG00000038945	ENSG00000276408	8:15848800:A:G_G	0.0274	0.408353	0.0274973	10000
CYP21A2	HLA-DQB1	ENSG00000231852	ENSG00000179344	6:31601513:A:G_G	0.0274	0.408353	0.0274973	10000
KRT17P1	CTD-2303H24.2	ENSG00000131885	ENSG00000273018	17:16740183:G:A_A	0.0275	0.408353	0.0275972	10000
GXYLT1P3	CR848007.2	ENSG00000232433	ENSG00000170165	9:42606554:C:T_T	0.0275	0.408353	0.0275972	10000
RP11-4L24.3	RP11-111F5.2	ENSG00000275450	ENSG00000231995	9:45570597:G:A_A	0.0278	0.410987	0.0278972	10000
RP11-927P21.8	ARL17A	ENSG00000272134	ENSG00000185829	17:62920871:C:T_T	0.0279	0.410987	0.0279972	10000
RP11-378J18.9	RP11-33B1.1	ENSG00000276997	ENSG00000245958	1:222648443:T:C_C	0.0279	0.410987	0.0279972	10000
RP11-87H9.4	FRG1HP	ENSG00000280077	ENSG00000276291	9:69007371:A:G_G	0.028	0.411366	0.0280972	10000
CCDC144A	USP32P1	ENSG00000170160	ENSG00000188933	17:15640538:A:G_G	0.0283	0.414673	0.0283972	10000
PRKX	MSC-AS1	ENSG00000183943	ENSG00000235531	X:2697599:C:A_A	0.0284	0.415041	0.0284972	10000
SNHG9	RPS2P5	ENSG00000255198	ENSG00000240342	16:2007727:G:A_A	0.0286	0.415769	0.0286971	10000
CSPG4P12	GOLGA6L10	ENSG00000259295	ENSG00000278662	15:85744521:T:C_C	0.0286	0.415769	0.0286971	10000
RHEBP2	BMS1P1	ENSG00000226964	ENSG00000204177	10:48106969:T:G_G	0.0288	0.417581	0.0288971	10000
CRHR1	LRRC37A4P	ENSG00000120088	ENSG00000214425	17:44685136:G:C_C	0.0293	0.418851	0.0293971	10000
USP32P1	USP32P2	ENSG00000188933	ENSG00000233327	17:16748833:G:A_A	0.0293	0.418851	0.0293971	10000
RP11-678G14.2	CTD-2561J22.5	ENSG00000268081	ENSG00000268119	19:22646903:CTCTTT:C_C	0.0293	0.418851	0.0293971	10000
TM4SF19	AC024560.2	ENSG00000145107	ENSG00000236833	3:195402200:C:T_T	0.0294	0.418851	0.0294971	10000
ZDHHC8	SMIM24	ENSG00000099904	ENSG00000095932	22:20657697:A:T_T	0.0295	0.418851	0.029597	10000
CTD-2303H24.2	KRT17P1	ENSG00000273018	ENSG00000131885	17:18262546:T:C_C	0.0295	0.418851	0.029597	10000
C22orf39	JPX	ENSG00000242259	ENSG00000225470	22:18878326:G:T_T	0.0296	0.418851	0.029697	10000
RP11-33B1.1	RP11-378J18.9	ENSG00000245958	ENSG00000276997	4:120485187:GA:G_G	0.0296	0.418851	0.029697	10000
ANKRD20A2	RP11-24B13.2	ENSG00000183148	ENSG00000270909	9:42431424:C:T_T	0.0297	0.418851	0.029797	10000
PRKX	ARSDP1	ENSG00000183943	ENSG00000225117	X:2697868:G:A_A	0.0298	0.418851	0.029897	10000
NSF	RP11-927P21.2	ENSG00000073969	ENSG00000266644	17:44606576:A:G_G	0.0299	0.418851	0.029997	10000
RP11-669E14.6	RP11-927P21.2	ENSG00000262372	ENSG00000266644	17:44153909:A:G_G	0.03	0.418851	0.030097	10000
GTF2IRD2P1	PMS2P5	ENSG00000214544	ENSG00000123965	7:72617556:AC:A_A	0.0301	0.418851	0.030197	10000
GGNBP2	CCL4L1	ENSG00000278311	ENSG00000276070	17:34489226:A:G_G	0.0302	0.418851	0.030297	10000
C22orf39	RP11-414C23.1	ENSG00000242259	ENSG00000278847	22:18717875:A:G_G	0.0303	0.418851	0.030397	10000
RP11-24B13.2	ANKRD20A2	ENSG00000270909	ENSG00000183148	9:43439555:C:T_T	0.0303	0.418851	0.030397	10000
KRT17P1	FAM106A	ENSG00000131885	ENSG00000213077	17:16748833:G:A_A	0.0304	0.418851	0.030497	10000
FAM86B3P	SLC35G5	ENSG00000173295	ENSG00000177710	8:8106406:G:T_T	0.0304	0.418851	0.030497	10000
AGAP7P	AGAP10P	ENSG00000264204	ENSG00000230869	10:51568378:T:G_G	0.0304	0.418851	0.030497	10000
CTC-457L16.1	USP32P1	ENSG00000279825	ENSG00000188933	17:18287838:G:T_T	0.0304	0.418851	0.030497	10000
C22orf39	USP9Y	ENSG00000242259	ENSG00000114374	22:18717875:A:G_G	0.0305	0.419186	0.0305969	10000
HLA-T	RNF5P1	ENSG00000231130	ENSG00000253570	6:29741660:C:T_T	0.0306	0.419519	0.0306969	10000
FAM90A2P	FAM66A	ENSG00000205879	ENSG00000227888	8:11046209:T:C_C	0.0307	0.419807	0.0307969	10000
PRR29-AS1	LRRC37A2	ENSG00000264954	ENSG00000238083	17:62918735:G:A_A	0.0308	0.419807	0.0308969	10000
ZNRD1-AS1	RNF5P1	ENSG00000204623	ENSG00000253570	6:30718035:A:C_C	0.0309	0.419807	0.0309969	10000
GPAT2	EIF1AX	ENSG00000186281	ENSG00000173674	2:96617537:GC:G_G	0.031	0.419807	0.0310969	10000
RP11-252A24.2	CLEC18A	ENSG00000214331	ENSG00000157322	16:74397775:A:G_G	0.031	0.419807	0.0310969	10000
KANSL1	DND1P1	ENSG00000120071	ENSG00000264070	17:44826056:C:G_G	0.0312	0.420783	0.0312969	10000
ANGPT4	RP11-206L10.2	ENSG00000101280	ENSG00000228327	20:76962:T:C_C	0.0313	0.420783	0.0313969	10000
LINC01410	GLIDR	ENSG00000238113	ENSG00000278175	9:66602816:C:T_T	0.0313	0.420783	0.0313969	10000
GPAT2	USP9X	ENSG00000186281	ENSG00000124486	2:96616121:T:C_C	0.0315	0.420945	0.0315968	10000
AC126544.4	ARL17A	ENSG00000282774	ENSG00000185829	17:43575228:T:C_C	0.0315	0.420945	0.0315968	10000
HLA-C	CYP21A2	ENSG00000204525	ENSG00000231852	6:30764907:G:A_A	0.0316	0.420945	0.0316968	10000
RP11-351I21.11	AF131215.2	ENSG00000270074	ENSG00000255310	8:12196123:G:A_A	0.0317	0.420945	0.0317968	10000
CH17-472G23.4	NA	ENSG00000275131	ENSG00000281741	1:144312688:T:C_C	0.0317	0.420945	0.0317968	10000
MAL	RPS4X	ENSG00000172005	ENSG00000198034	2:96616121:T:C_C	0.0319	0.420945	0.0319968	10000
RNA5SP311	CTSLP2	ENSG00000238405	ENSG00000280913	10:46909942:C:G_G	0.0319	0.420945	0.0319968	10000
ZFX	ANOS2P	ENSG00000005889	ENSG00000241859	X:24111451:A:C_C	0.0321	0.420945	0.0321968	10000
FAM86B1	FAM66B	ENSG00000186523	ENSG00000215374	8:12001659:T:C_C	0.0321	0.420945	0.0321968	10000
PSORS1C1	HLA-DQB1	ENSG00000204540	ENSG00000179344	6:31311318:A:G_G	0.0322	0.420945	0.0322968	10000
CTD-2349P21.7	MT-RNR1	ENSG00000279337	ENSG00000211459	17:29154152:A:C_C	0.0322	0.420945	0.0322968	10000
RN7SL656P	LRRC37A4P	ENSG00000265411	ENSG00000214425	17:44634881:G:A_A	0.0323	0.420945	0.0323968	10000
RP11-524F11.3	RP11-92B11.3	ENSG00000279200	ENSG00000264673	17:18404709:G:A_A	0.0323	0.420945	0.0323968	10000
CCDC74A	TUBA3E	ENSG00000163040	ENSG00000152086	2:132245463:C:A_A	0.0325	0.42151	0.0325967	10000
AC018804.6	MZT2A	ENSG00000227632	ENSG00000173272	2:130957991:CTCTACATTG:C_C	0.0325	0.42151	0.0325967	10000
LRRC37A4P	RP11-583F2.1	ENSG00000214425	ENSG00000264057	17:44573974:A:G_G	0.0326	0.42151	0.0326967	10000
TRIM51FP	TRIM51DP	ENSG00000219061	ENSG00000255190	11:48858852:A:T_T	0.0327	0.42151	0.0327967	10000
RP11-764K9.1	FOXD4L6	ENSG00000225411	ENSG00000273514	9:69007371:A:G_G	0.0328	0.42151	0.0328967	10000
RP11-561O23.5	BMS1P10	ENSG00000234394	ENSG00000237238	9:70207026:C:T_T	0.0328	0.42151	0.0328967	10000
RP11-583F2.1	LRRC37A4P	ENSG00000264057	ENSG00000214425	17:62929293:C:CA_CA	0.0331	0.424381	0.0331967	10000
POM121C	SPDYE10P	ENSG00000272391	ENSG00000274570	7:75044431:C:T_T	0.0335	0.42782	0.0335966	10000
VARS2	HLA-DQB1	ENSG00000137411	ENSG00000179344	6:31102884:T:C_C	0.0336	0.42782	0.0336966	10000
SHMT1	CCDC144A	ENSG00000176974	ENSG00000170160	17:18405927:G:A_A	0.0336	0.42782	0.0336966	10000
F8A1	GYG2P1	ENSG00000277203	ENSG00000206159	X:154984651:G:A_A	0.0337	0.42811	0.0337966	10000
CYP21A2	HLA-C	ENSG00000231852	ENSG00000204525	6:32380715:C:T_T	0.0338	0.428397	0.0338966	10000
ZSCAN26	RNF5P1	ENSG00000197062	ENSG00000253570	6:28678357:T:C_C	0.0339	0.428684	0.0339966	10000
PRODH	RNU2-57P	ENSG00000100033	ENSG00000252468	22:18878224:T:G_G	0.0343	0.430376	0.0343966	10000
RNF123	GPX1P1	ENSG00000164068	ENSG00000197582	3:49206920:CA:C_C	0.0343	0.430376	0.0343966	10000
RP11-259G18.2	RP11-927P21.1	ENSG00000262500	ENSG00000265218	17:44084335:TAAAATAAAATAAATA:T_T	0.0343	0.430376	0.0343966	10000
CSDC2	AC007228.9	ENSG00000172346	ENSG00000268568	22:41900713:G:GA_GA	0.0344	0.430376	0.0344966	10000
FAM215B	LRRC37A4P	ENSG00000232300	ENSG00000214425	17:44629929:A:G_G	0.0345	0.430376	0.0345965	10000
RP11-353N4.6	NBPF19	ENSG00000275557	ENSG00000271383	1:148814296:T:A_A	0.0346	0.430653	0.0346965	10000
AC026150.6	RP11-632K20.7	ENSG00000260784	ENSG00000223509	15:30846509:A:G_G	0.0348	0.432171	0.0348965	10000
SLC35G5	RP11-481A20.10	ENSG00000177710	ENSG00000254507	8:10791396:T:G_G	0.0349	0.432444	0.0349965	10000
C4A	CYP21A2	ENSG00000244731	ENSG00000231852	6:30969754:G:A_A	0.035	0.432715	0.0350965	10000
LIPI	NA	ENSG00000188992	ENSG00000277572	21:15255317:C:T_T	0.0354	0.435715	0.0354965	10000
VPS9D1	WASIR2	ENSG00000075399	ENSG00000231439	16:90160010:T:A_A	0.0356	0.437205	0.0356964	10000
GOLGA6L9	DNM1P51	ENSG00000197978	ENSG00000235370	15:82749548:ATCTAT:A_A	0.0359	0.438484	0.0359964	10000
LINC01168	RP11-411B10.7	ENSG00000240707	ENSG00000279352	10:135443391:C:T_T	0.036	0.438484	0.0360964	10000
BRD2	BCS1L	ENSG00000204256	ENSG00000074582	6:32557418:A:G_G	0.0361	0.438484	0.0361964	10000
BMS1P10	RP11-15J10.1	ENSG00000237238	ENSG00000204778	9:67358853:C:T_T	0.0361	0.438484	0.0361964	10000
RP11-318K12.2	ANKRD20A4	ENSG00000275390	ENSG00000172014	9:66475225:C:A_A	0.0361	0.438484	0.0361964	10000
RP11-497H16.8	RP11-1319K7.1	ENSG00000253333	ENSG00000179978	5:70497267:A:T_T	0.0363	0.439949	0.0363964	10000
RP11-156P1.3	RP11-798G7.6	ENSG00000262879	ENSG00000267198	17:44736722:CCCTT:C_C	0.0365	0.441407	0.0365963	10000
TDH	FAM85B	ENSG00000154316	ENSG00000253893	8:11109269:T:C_C	0.0367	0.441896	0.0367963	10000
GTF2IRD2B	STAG3L3	ENSG00000174428	ENSG00000174353	7:74540040:A:G_G	0.0369	0.442861	0.0369963	10000
FRG1JP	GXYLT1P5	ENSG00000215548	ENSG00000276591	9:69417184:T:C_C	0.037	0.442861	0.0370963	10000
SLC35G5	OR7E161P	ENSG00000177710	ENSG00000206014	8:10782442:A:C_C	0.0371	0.442861	0.0371963	10000
CCDC43	RP11-927P21.1	ENSG00000180329	ENSG00000265218	17:43664728:G:A_A	0.0371	0.442861	0.0371963	10000
KDM6A	ANOS2P	ENSG00000147050	ENSG00000241859	X:45652124:T:C_C	0.0372	0.4431	0.0372963	10000
SNAP47	GATM-AS1	ENSG00000143740	ENSG00000275672	1:227693994:G:A_A	0.0376	0.4431	0.0376962	10000
SRGAP2C	RP11-403I13.7	ENSG00000171943	ENSG00000226067	1:121462077:T:C_C	0.0376	0.4431	0.0376962	10000
IL18R1	RP11-211G3.2	ENSG00000115604	ENSG00000223401	2:103082280:G:A_A	0.0379	0.444254	0.0379962	10000
HLA-DQB1	VARS2	ENSG00000179344	ENSG00000137411	6:32179438:G:A_A	0.0382	0.444254	0.0382962	10000
CYP21A1P	FLOT1	ENSG00000204338	ENSG00000137312	6:32802712:TTTG:T_T	0.0383	0.444254	0.0383962	10000
MICF	TNXA	ENSG00000233265	ENSG00000248290	6:29921100:C:G_G	0.0383	0.444254	0.0383962	10000
MADD	NA	ENSG00000110514	ENSG00000280615	11:47512807:CA:C_C	0.0384	0.444254	0.0384962	10000
LRRC37A3	KANSL1-AS1	ENSG00000176809	ENSG00000214401	17:62927845:T:C_C	0.0384	0.444254	0.0384962	10000
GTF2IRD2	POMZP3	ENSG00000196275	ENSG00000146707	7:74317215:G:C_C	0.0384	0.444254	0.0384962	10000
STH	RPS26P8	ENSG00000256762	ENSG00000204652	17:44736634:G:A_A	0.0384	0.444254	0.0384962	10000
XXbac-B461K10.4	ANOS2P	ENSG00000093100	ENSG00000241859	22:18883763:G:T_T	0.0385	0.444254	0.0385961	10000
OR7E161P	SLC35G5	ENSG00000206014	ENSG00000177710	8:12199599:T:A_A	0.0385	0.444254	0.0385961	10000
LRRC37A2	RP11-707O23.5	ENSG00000238083	ENSG00000263503	17:44759766:G:A_A	0.0387	0.444709	0.0387961	10000
GTF2IRD2	PMS2P2	ENSG00000196275	ENSG00000278416	7:75052102:G:A_A	0.0393	0.450668	0.0393961	10000
RP11-154P18.2	CNTNAP3B	ENSG00000233765	ENSG00000154529	9:69941374:C:T_T	0.0396	0.451516	0.039696	10000
MZT2A	AC018804.6	ENSG00000173272	ENSG00000227632	2:132264514:C:T_T	0.0397	0.451516	0.039796	10000
RNU1-122P	NA	ENSG00000202408	ENSG00000274265	1:148555784:G:A_A	0.0397	0.451516	0.039796	10000
AGAP7P	AGAP4	ENSG00000264204	ENSG00000188234	10:51773219:C:T_T	0.0399	0.452861	0.039996	10000
TMEM102	EIF5AP4	ENSG00000181284	ENSG00000234743	17:7206802:G:A_A	0.0403	0.456465	0.040396	10000
FLOT1	HLA-DQB1	ENSG00000137312	ENSG00000179344	6:31311318:A:G_G	0.0404	0.456664	0.040496	10000
RP11-981G7.1	FAM86B3P	ENSG00000261451	ENSG00000173295	8:10224998:A:T_T	0.0405	0.456862	0.0405959	10000
HLA-J	RNF5P1	ENSG00000204622	ENSG00000253570	6:29644329:A:AG_AG	0.0406	0.457059	0.0406959	10000
TBX1	SMIM24	ENSG00000184058	ENSG00000095932	22:18878335:A:G_G	0.0408	0.458379	0.0408959	10000
RP9P	FKBP9P1	ENSG00000205763	ENSG00000176826	7:33045285:G:A_A	0.0409	0.458572	0.0409959	10000
ADAMTS7P4	SC22CB-1E7.1	ENSG00000218052	ENSG00000232346	15:85744337:A:G_G	0.0412	0.460073	0.0412959	10000
RP11-632K20.2	AC026150.6	ENSG00000254912	ENSG00000260784	15:32823771:T:C_C	0.0413	0.460262	0.0413959	10000
RP11-449H15.2	ANKRD20A4	ENSG00000231838	ENSG00000172014	9:46096758:G:C_C	0.0415	0.460637	0.0415958	10000
STH	NA	ENSG00000256762	ENSG00000278770	17:44634881:G:A_A	0.0415	0.460637	0.0415958	10000
RP11-291L22.9	ZNF33B	ENSG00000276805	ENSG00000196693	10:38789055:G:A_A	0.0418	0.463039	0.0418958	10000
ADGRF5P1	RP11-24B13.2	ENSG00000227582	ENSG00000270909	9:65610301:T:G_G	0.0419	0.463221	0.0419958	10000
CTC-338M12.13	AP006222.2	ENSG00000274525	ENSG00000228463	5:180723288:G:A_A	0.0423	0.465126	0.0423958	10000
FAM86B1	RP11-981G7.6	ENSG00000186523	ENSG00000272505	8:12203956:A:G_G	0.0425	0.465126	0.0425957	10000
AC125634.1	ANKRD20A7P	ENSG00000223602	ENSG00000236816	9:69650162:G:C_C	0.0426	0.465126	0.0426957	10000
FLOT1	CYP21A1P	ENSG00000137312	ENSG00000204338	6:30082688:G:C_C	0.0428	0.465126	0.0428957	10000
GPAT2	KDM5C	ENSG00000186281	ENSG00000126012	2:96627015:A:C_C	0.0429	0.465126	0.0429957	10000
RP11-497H16.9	GTF2H2	ENSG00000269983	ENSG00000145736	5:69081633:TATATA:T_T	0.0429	0.465126	0.0429957	10000
HLA-J	CYP21A2	ENSG00000204622	ENSG00000231852	6:30507920:A:G_G	0.0432	0.465126	0.0432957	10000
FAM90A25P	AF131215.9	ENSG00000251402	ENSG00000269918	8:12149782:T:C_C	0.0435	0.465126	0.0435956	10000
FAM66D	ENPP7P1	ENSG00000255052	ENSG00000249188	8:12058803:G:A_A	0.0435	0.465126	0.0435956	10000
RP11-379H8.1	GOLGA6L10	ENSG00000278013	ENSG00000278662	15:82900243:G:A_A	0.0435	0.465126	0.0435956	10000
RP11-669E14.4	LRRC37A4P	ENSG00000262881	ENSG00000214425	17:44674935:G:C_C	0.0436	0.465297	0.0436956	10000
FAM166A	WASIR2	ENSG00000188163	ENSG00000231439	9:141071248:C:T_T	0.0437	0.465468	0.0437956	10000
RP11-583F2.1	LRRC37A2	ENSG00000264057	ENSG00000238083	17:62912347:C:T_T	0.0438	0.465637	0.0438956	10000
C22orf39	NAP1L3	ENSG00000242259	ENSG00000186310	22:18717912:T:C_C	0.0439	0.465806	0.0439956	10000
ANKRD20A4	RP11-318K12.2	ENSG00000172014	ENSG00000275390	9:69864292:A:G_G	0.044	0.465975	0.0440956	10000
ARL17B	ARL17A	ENSG00000228696	ENSG00000185829	17:43540449:G:C_C	0.0441	0.466143	0.0441956	10000
GS1-124K5.10	GTF2IP14	ENSG00000234500	ENSG00000226002	7:65684060:T:G_G	0.0444	0.46842	0.0444956	10000
CTD-2020K17.3	ARL17A	ENSG00000233175	ENSG00000185829	17:43292035:C:G_G	0.0452	0.472515	0.0452955	10000
C22orf39	RP11-706O15.1	ENSG00000242259	ENSG00000205664	22:18721267:T:C_C	0.0456	0.47475	0.0456954	10000
ANKRD20A4	RP11-449H15.2	ENSG00000172014	ENSG00000231838	9:69184096:G:T_T	0.046	0.476229	0.0460954	10000
DUX4L50	NA	ENSG00000232815	ENSG00000274869	9:69114324:A:G_G	0.0461	0.476374	0.0461954	10000
AQP7P1	ANKRD20A4	ENSG00000186466	ENSG00000172014	9:66599631:A:G_G	0.0467	0.476523	0.0467953	10000
LRRC37A	DND1P1	ENSG00000176681	ENSG00000264070	17:44782629:G:GTC_GTC	0.0471	0.476523	0.0471953	10000
CTD-2020K17.1	ARL17A	ENSG00000267121	ENSG00000185829	17:43576046:T:TG_TG	0.0475	0.476523	0.0475952	10000
RP11-206L10.2	FAM157A	ENSG00000228327	ENSG00000236438	1:239258:G:T_T	0.0485	0.476523	0.0485951	10000
WNT3	CRHR1-IT1	ENSG00000108379	ENSG00000204650	17:44740976:G:A_A	0.0487	0.476523	0.0487951	10000
CTB-92J24.2	LINC00662	ENSG00000269397	ENSG00000261824	19:24628562:C:A_A	0.0487	0.476523	0.0487951	10000
RP11-1212A22.1	NOMO3	ENSG00000205746	ENSG00000103226	16:18519874:AC:A_A	0.0492	0.476523	0.0492951	10000
Note:
eQTL is in the format of chromosome: position (hg19): reference allele: alternative allele _ coding allele
